# Supplementary material for: The Influence of Ligands on the Pd-Catalyzed Diarylation of Vinyl Esters
Source: MDPI journal article supplement (doi:10.3390/molecules29102268), 2024-05-11

Supporting Information for:

## **The influence of ligands on the Pd-catalyzed diarylation of vinyl esters.**

**Anna Brodzka <sup>1,\*</sup>, Dominik Koszelewski <sup>1</sup>, Anna Trzeciak <sup>2</sup>, Lena Ruzik <sup>3</sup>, Malgorzta Grela <sup>1</sup> and Ryszard Ostaszewski <sup>1,\*</sup>**

<sup>1</sup> Institute of Organic Chemistry, Polish Academy of Sciences, Kasprzaka 44/52, 01-224 Warsaw, Poland;

<sup>2</sup> Faculty of Chemistry, University of Wrocław, F. Joliot-Curie 14, 50-383 Wrocław, Poland

<sup>3</sup> Faculty of Chemistry, Warsaw University of Technology, Noakowskiego 3, 00-664, Warsaw, Poland

\* Correspondence: anna.brodzka@icho.edu.pl (A.B.), ryszard.ostaszewski@icho.edu.pl

**1,2-diphenylethyl acetate (3)**

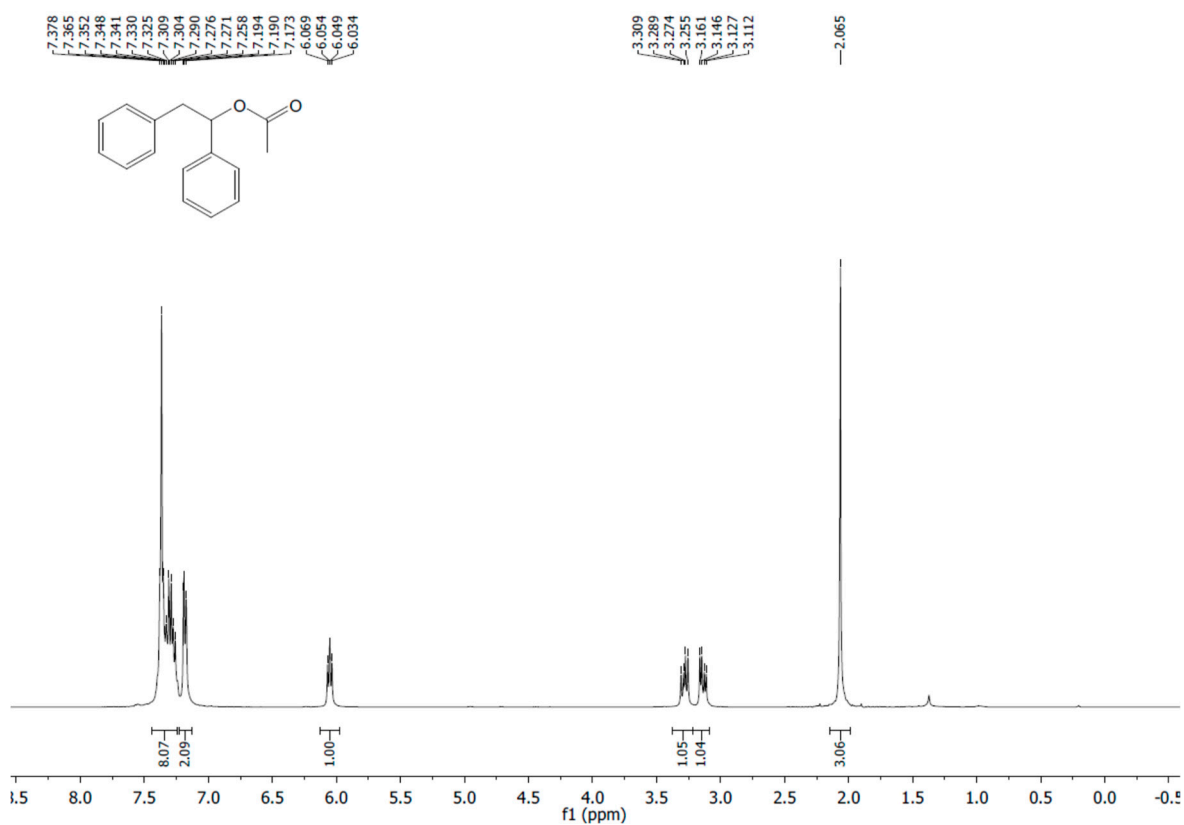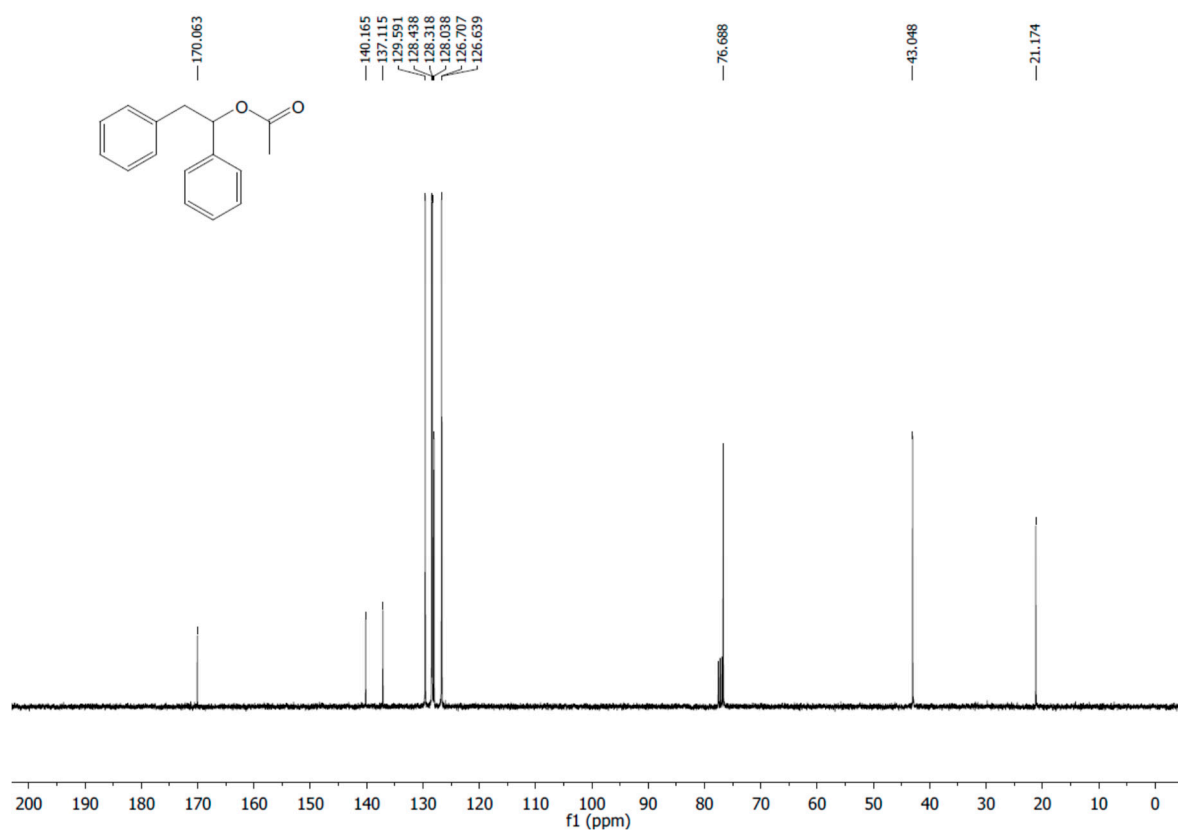

# Stilbene (4)

7.532  
7.529  
7.524  
7.515  
7.511  
7.508  
7.503  
7.380  
7.375  
7.362  
7.358  
7.346  
7.342  
7.282  
7.279  
7.276  
7.266  
7.261  
7.255  
7.242  
7.115

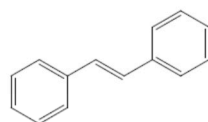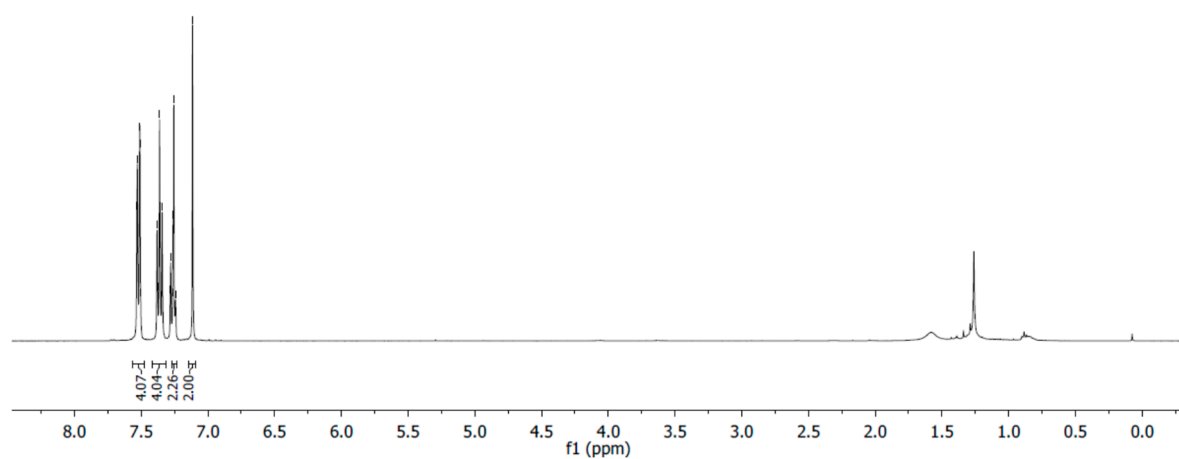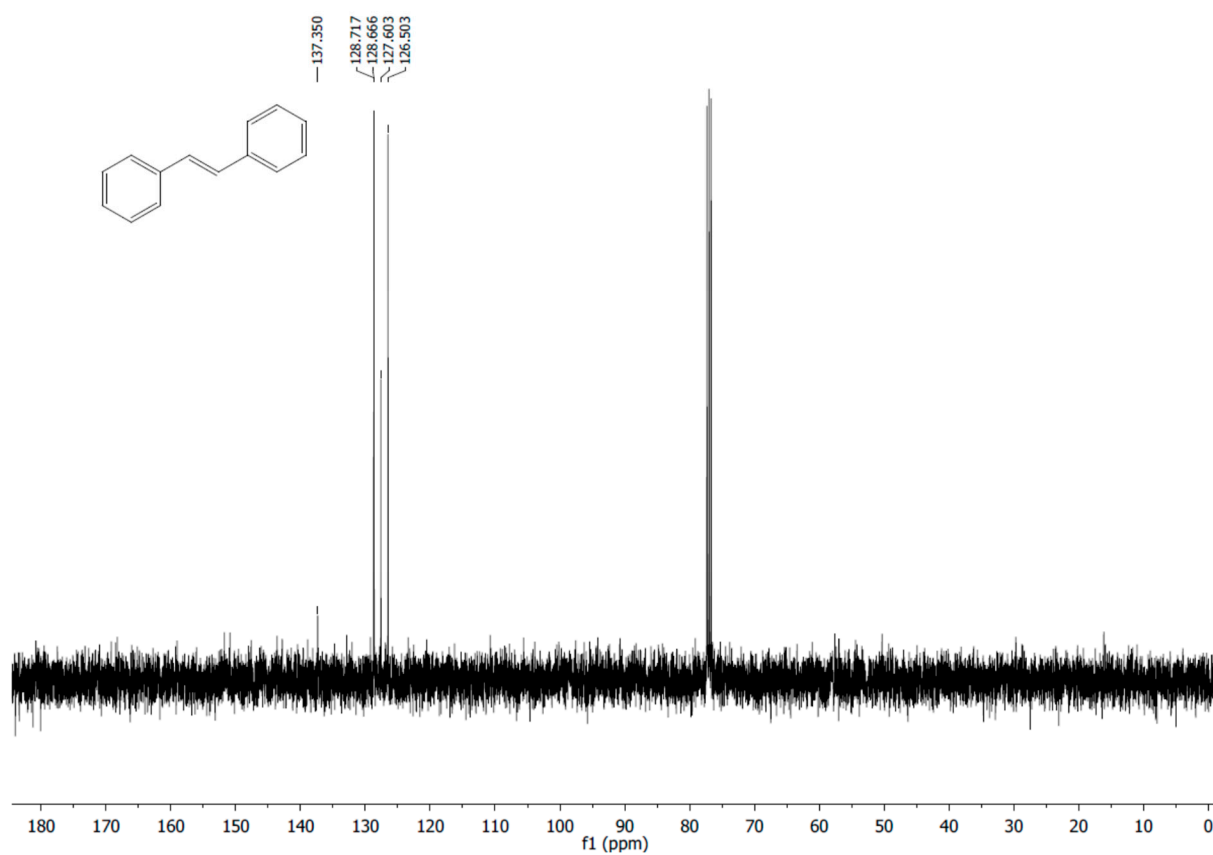

# 2-phenyl-1,4-benzoquinone (5)

7.491  
7.485  
7.481  
7.478  
7.474  
7.473  
7.466  
7.463  
7.460  
7.457  
7.455  
7.452  
7.447  
7.441  
7.437  
7.433  
7.427  
7.421  
6.876  
6.863  
6.858  
6.851  
6.835  
6.829  
6.809  
6.804

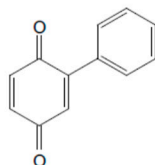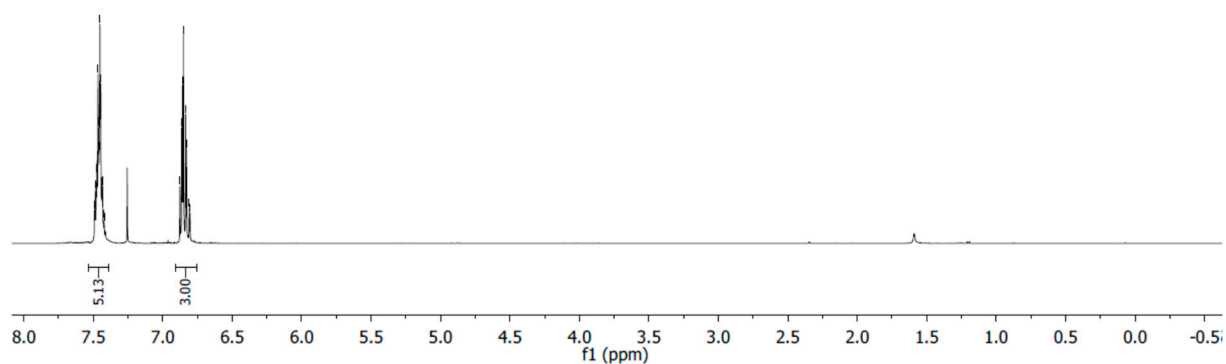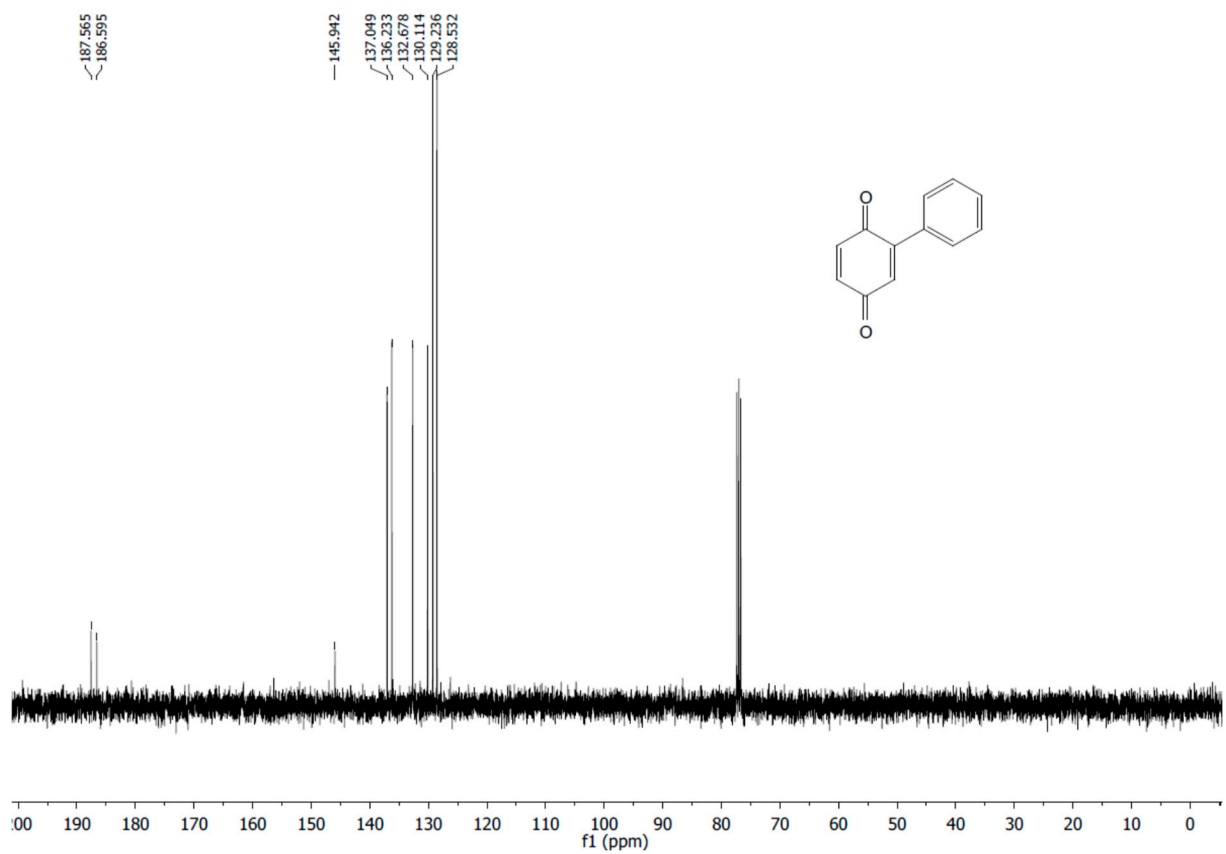

**1,2-bis(3,4-dimethoxyphenyl)ethyl acetate (6)**

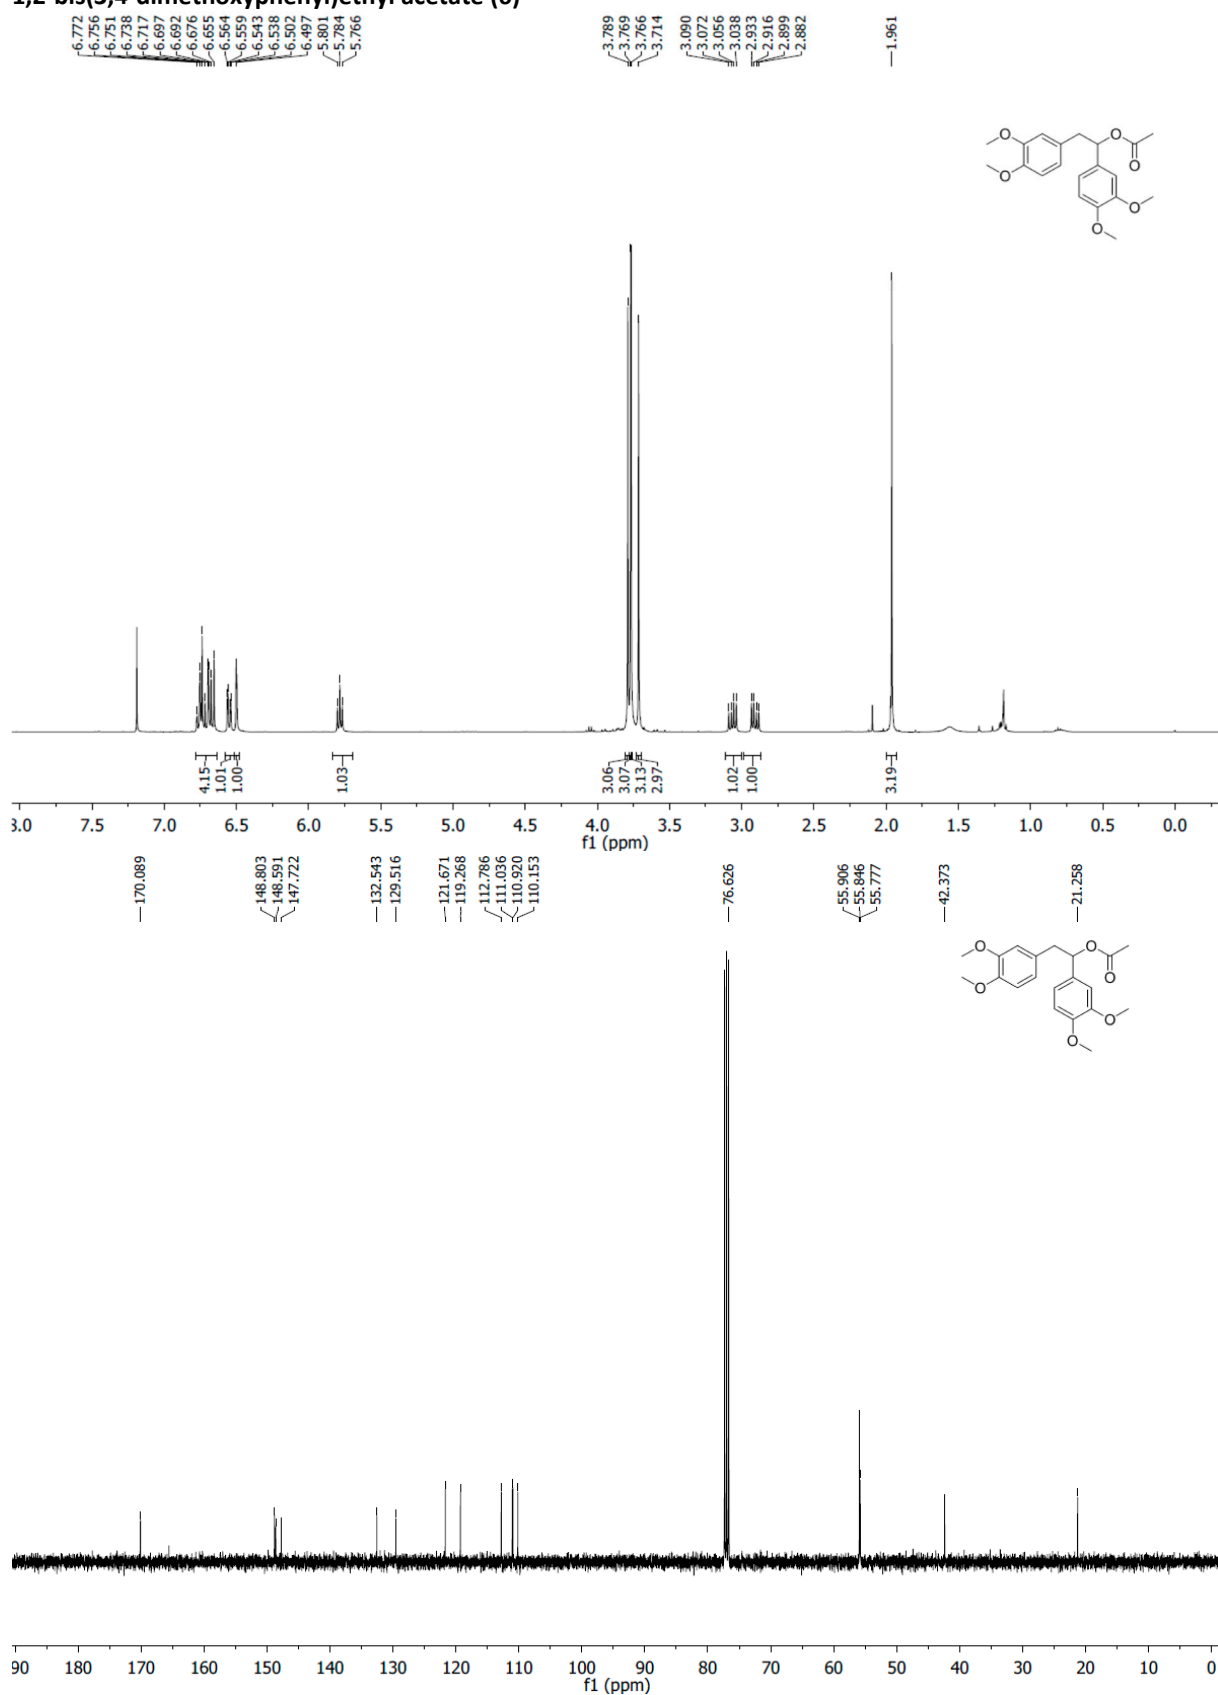

# 1,2-diphenylethyl benzoate (7)

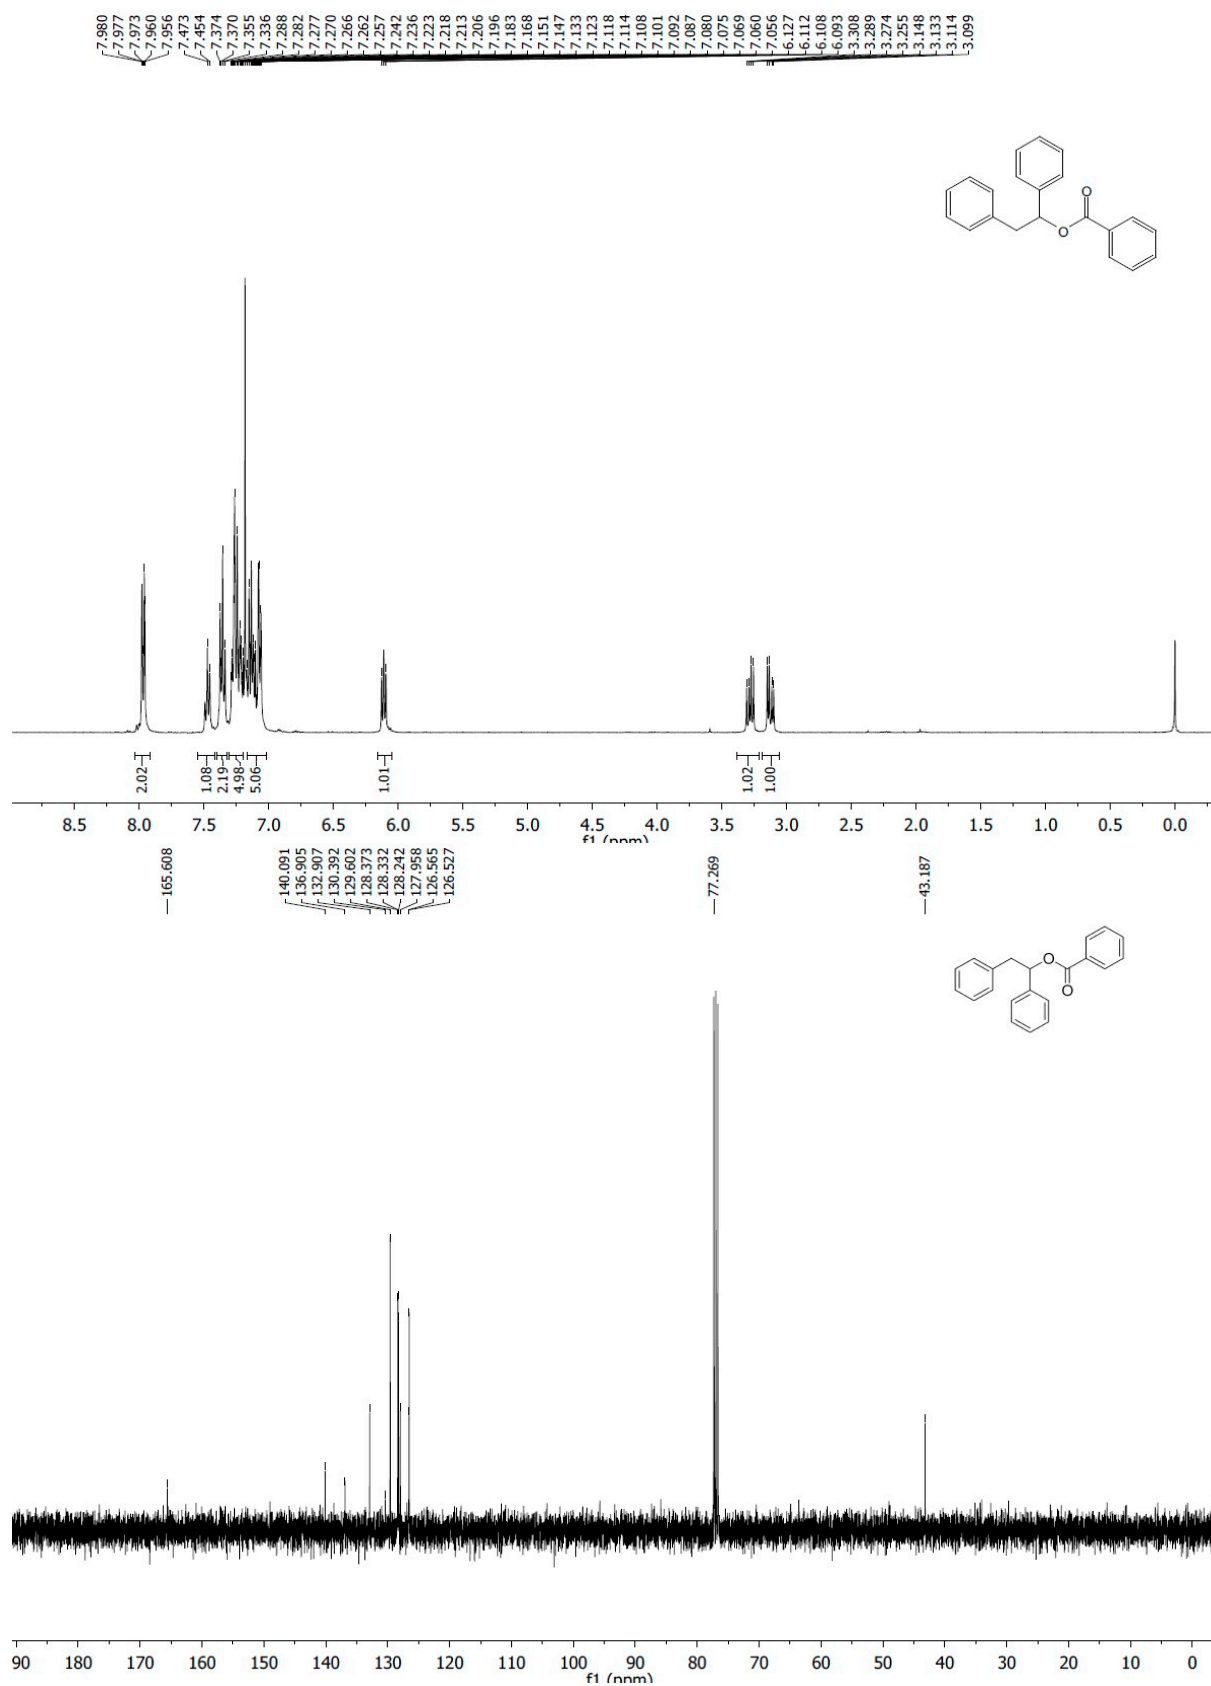

Supplement: s1 [file s1]
